# Supplementary material for: The Antineoplastic Effect of Carboplatin Is Potentiated by Combination with Pitavastatin or Metformin in a Chemoresistant High-Grade Serous Carcinoma Cell Line
Source: MDPI journal article supplement (doi:10.3390/ijms24010097), 2022-12-21
Supplement: s1 [file s1]

## Supplementary Material

**Table S1.** Cellular viability (%) of OVCAR8 and OVCAR8 PTX R P cells, after exposure to a fixed doses ratio that corresponds to 0.25, 0.5, 1, 2 and 4 times the individual IC<sub>50</sub> values of each drug for 48 h. The combined treatment was co-administered at the same time. All assays were done in triplicate in at least three independent experiments. SD, standard deviation.

| Treatment                                  | Concentration | OVCAR8                 |        | OVCAR8 PTX R P         |        |
|--------------------------------------------|---------------|------------------------|--------|------------------------|--------|
|                                            |               | Cellular viability (%) |        | Cellular viability (%) |        |
|                                            |               | Media                  | SD     | Media                  | SD     |
| Carboplatin (μM)                           | 0.25 x IC50   | 92.531                 | 0.672  | 87.570                 | 1.918  |
|                                            | 0.5 x IC50    | 78.349                 | 8.436  | 75.397                 | 3.802  |
|                                            | IC50          | 60.702                 | 5.190  | 57.172                 | 4.484  |
|                                            | 2 x IC50      | 9.962                  | 2.159  | 24.033                 | 8.183  |
|                                            | 4 x IC50      | 3.178                  | 1.576  | 3.973                  | 1.422  |
| Pitavastatin (μM)                          | 0.25 x IC50   | 60.608                 | 3.877  | 60.785                 | 7.665  |
|                                            | 0.5 x IC50    | 52.738                 | 3.251  | 49.751                 | 2.207  |
|                                            | IC50          | 46.854                 | 2.547  | 44.716                 | 1.406  |
|                                            | 2 x IC50      | 35.398                 | 3.108  | 28.515                 | 4.045  |
|                                            | 4 x IC50      | 29.124                 | 6.221  | 28.178                 | 3.446  |
| Carboplatin (μM)<br>+<br>Pitavastatin (μM) | 0.25 x IC50   | 60.349                 | 2.856  | 56.075                 | 10.193 |
|                                            | 0.5 x IC50    | 48.552                 | 1.908  | 40.283                 | 6.228  |
|                                            | IC50          | 31.048                 | 1.237  | 25.796                 | 3.497  |
|                                            | 2 x IC50      | 19.453                 | 4.417  | 12.832                 | 8.774  |
|                                            | 4 x IC50      | 5.576                  | 0.735  | 4.173                  | 2.130  |
| Metformin (mM)                             | 0.25 x IC50   | 73.629                 | 4.867  | 75.521                 | 1.641  |
|                                            | 0.5 x IC50    | 60.764                 | 1.710  | 60.300                 | 1.300  |
|                                            | IC50          | 46.377                 | 4.049  | 45.069                 | 0.889  |
|                                            | 2 x IC50      | 19.461                 | 2.920  | 12.592                 | 1.286  |
|                                            | 4 x IC50      | 15.469                 | 3.467  | 7.795                  | 1.018  |
| Carboplatin (μM)<br>+<br>Metformin (mM)    | 0.25 x IC50   | 70.624                 | 3.533  | 73.912                 | 1.977  |
|                                            | 0.5 x IC50    | 54.726                 | 1.645  | 55.091                 | 4.483  |
|                                            | IC50          | 8.641                  | 1.962  | 9.897                  | 3.787  |
|                                            | 2 x IC50      | 7.105                  | 1.963  | 8.138                  | 1.219  |
|                                            | 4 x IC50      | 4.060                  | 0.503  | 3.435                  | 1.049  |
| Ivermectin (μM)                            | 0.25 x IC50   | 76.543                 | 1.978  | 81.214                 | 2.466  |
|                                            | 0.5 x IC50    | 68.485                 | 0.746  | 64.803                 | 2.168  |
|                                            | IC50          | 42.511                 | 1.788  | 44.580                 | 3.147  |
|                                            | 2 x IC50      | 0.514                  | 0.050  | 1.210                  | 1.256  |
|                                            | 4 x IC50      | 0.379                  | 0.299  | 0.494                  | 0.183  |
| Carboplatin (μM)<br>+<br>Ivermectin (μM)   | 0.25 x IC50   | 91.320                 | 7.718  | 95.832                 | 3.646  |
|                                            | 0.5 x IC50    | 74.018                 | 11.931 | 73.639                 | 9.023  |
|                                            | IC50          | 32.828                 | 3.453  | 25.286                 | 3.508  |
|                                            | 2 x IC50      | 0.290                  | 0.214  | 1.644                  | 1.348  |
|                                            | 4 x IC50      | 0.020                  | 0.451  | 0.593                  | 0.905  |
| Itraconazole (μM)                          | 0.25 x IC50   | 94.332                 | 7.175  | 90.418                 | 14.825 |
|                                            | 0.5 x IC50    | 95.498                 | 3.874  | 97.015                 | 19.576 |

|                                                          |             |        |       |        |        |
|----------------------------------------------------------|-------------|--------|-------|--------|--------|
|                                                          | IC50        | 95.141 | 6.063 | 94.016 | 16.247 |
|                                                          | 2 x IC50    | 98.250 | 2.400 | 91.571 | 13.226 |
|                                                          | 4 x IC50    | 98.398 | 7.288 | 89.624 | 7.916  |
| <b>Carboplatin (μM)</b><br>+<br><b>Itraconazole (μM)</b> | 0.25 x IC50 | 89.970 | 1.158 | 90.445 | 10.179 |
|                                                          | 0.5 x IC50  | 80.492 | 3.557 | 76.639 | 6.622  |
|                                                          | IC50        | 63.513 | 3.335 | 56.847 | 8.386  |
|                                                          | 2 x IC50    | 44.603 | 4.434 | 28.241 | 8.300  |
|                                                          | 4 x IC50    | 4.998  | 3.142 | 3.299  | 1.794  |
| <b>Alendronate (μM)</b>                                  | 0.25 x IC50 | 99.951 | 1.327 | 98.798 | 3.424  |
|                                                          | 0.5 x IC50  | 92.024 | 2.157 | 85.644 | 0.167  |
|                                                          | IC50        | 44.307 | 4.276 | 46.798 | 3.093  |
|                                                          | 2 x IC50    | 37.529 | 4.275 | 41.214 | 5.101  |
|                                                          | 4 x IC50    | 31.770 | 5.646 | 40.422 | 5.688  |
| <b>Paclitaxel (nM)</b><br>+<br><b>Alendronate (μM)</b>   | 0.25 x IC50 | 92.829 | 5.804 | 92.727 | 6.105  |
|                                                          | 0.5 x IC50  | 80.026 | 9.039 | 75.374 | 11.574 |
|                                                          | IC50        | 29.772 | 1.781 | 30.868 | 3.128  |
|                                                          | 2 x IC50    | 18.664 | 3.727 | 16.565 | 3.230  |
|                                                          | 4 x IC50    | 6.752  | 0.061 | 6.396  | 1.081  |

**Table S2.** Cellular viability (%) of HOSE6.3 cells, after exposure to a fixed doses ratio that corresponds to 0.25, 0.5, 1, 2 and 4 times the individual IC<sub>50</sub> values of each drug for 48 h. The combined treatment was co-administered at the same time. All assays were done in triplicate in at least three independent experiments. SD, standard deviation.

| Treatment                                  | Concentration | HOSE6.3                |       |
|--------------------------------------------|---------------|------------------------|-------|
|                                            |               | Cellular viability (%) |       |
|                                            |               | Media                  | SD    |
| Carboplatin (μM)                           | 0.25 × IC50   | 88.270                 | 5.412 |
|                                            | 0.5 × IC50    | 80.640                 | 1.159 |
|                                            | IC50          | 72.731                 | 4.688 |
|                                            | 2 × IC50      | 73.328                 | 1.388 |
|                                            | 4 × IC50      | 51.060                 | 2.693 |
| Pitavastatin (μM)                          | 0.25 × IC50   | 81.849                 | 7.680 |
|                                            | 0.5 × IC50    | 76.512                 | 7.815 |
|                                            | IC50          | 68.461                 | 3.472 |
|                                            | 2 × IC50      | 65.889                 | 5.045 |
|                                            | 4 × IC50      | 61.442                 | 2.761 |
| Carboplatin (μM)<br>+<br>Pitavastatin (μM) | 0.25 × IC50   | 85.461                 | 3.279 |
|                                            | 0.5 × IC50    | 85.366                 | 2.539 |
|                                            | IC50          | 78.648                 | 2.658 |
|                                            | 2 × IC50      | 70.445                 | 0.900 |
|                                            | 4 × IC50      | 53.617                 | 2.412 |
| Metformin (mM)                             | 0.25 × IC50   | 96.286                 | 4.708 |
|                                            | 0.5 × IC50    | 97.225                 | 1.002 |
|                                            | IC50          | 95.033                 | 1.429 |
|                                            | 2 × IC50      | 96.033                 | 1.778 |
|                                            | 4 × IC50      | 92.366                 | 2.639 |
| Carboplatin (μM)<br>+<br>Metformin (mM)    | 0.25 × IC50   | 99.735                 | 1.395 |
|                                            | 0.5 × IC50    | 94.038                 | 1.253 |
|                                            | IC50          | 86.581                 | 1.751 |
|                                            | 2 × IC50      | 73.321                 | 2.244 |
|                                            | 4 × IC50      | 60.842                 | 0.441 |
| Ivermectin (μM)                            | 0.25 × IC50   | 100.990                | 2.144 |
|                                            | 0.5 × IC50    | 99.694                 | 3.725 |
|                                            | IC50          | 53.462                 | 2.873 |
|                                            | 2 × IC50      | 0.539                  | 1.365 |
|                                            | 4 × IC50      | 0.000                  | 0.544 |
| Carboplatin (μM)<br>+<br>Ivermectin (μM)   | 0.25 × IC50   | 99.024                 | 1.122 |
|                                            | 0.5 × IC50    | 99.061                 | 1.886 |
|                                            | IC50          | 47.689                 | 3.598 |
|                                            | 2 × IC50      | 2.2495                 | 0.514 |
|                                            | 4 × IC50      | 1.942                  | 0.937 |
| Itraconazole (μM)                          | 0.25 × IC50   | 86.353                 | 3.252 |
|                                            | 0.5 × IC50    | 84.356                 | 1.857 |
|                                            | IC50          | 84.735                 | 3.865 |
|                                            | 2 × IC50      | 79.729                 | 1.179 |
|                                            | 4 × IC50      | 77.370                 | 3.174 |

|                                                                 |             |         |       |
|-----------------------------------------------------------------|-------------|---------|-------|
| <b>Carboplatin (μM)</b><br><b>+</b><br><b>Itraconazole (μM)</b> | 0.25 × IC50 | 99.610  | 1.337 |
|                                                                 | 0.5 × IC50  | 92.847  | 1.446 |
|                                                                 | IC50        | 87.060  | 1.599 |
|                                                                 | 2 × IC50    | 74.815  | 3.392 |
|                                                                 | 4 × IC50    | 62.169  | 0.574 |
| <b>Alendronate (μM)</b>                                         | 0.25 × IC50 | 101.792 | 6.109 |
|                                                                 | 0.5 × IC50  | 101.959 | 6.966 |
|                                                                 | IC50        | 92.147  | 2.125 |
|                                                                 | 2 × IC50    | 89.188  | 5.221 |
|                                                                 | 4 × IC50    | 84.305  | 5.970 |
| <b>Carboplatin (μM)</b><br><b>+</b><br><b>Alendronate (μM)</b>  | 0.25 × IC50 | 99.274  | 0.455 |
|                                                                 | 0.5 × IC50  | 96.901  | 0.646 |
|                                                                 | IC50        | 94.532  | 3.028 |
|                                                                 | 2 × IC50    | 92.908  | 2.486 |
|                                                                 | 4 × IC50    | 76.021  | 3.396 |
